# Supplementary material
Source: PubMed Central journal article supplement (PMC5757696)
Supplement: blood780379-suppl1.pdf [file blood780379-suppl1.pdf]

## **Supplemental Data**

### **Supplemental Methods**

#### **Colony-forming unit assay for megakaryocytes (MKs)**

The collagen-based MegaCult-C Kit (STEMCELL Technologies) was used for the CFU-MK colony-forming assays. Suspended iPSCs or CB CD34<sup>+</sup> cells (7500–10,000 cells) at day 14 in culture were seeded onto one double chamber slide with semiliquid culture medium. After 10~12 days in culture, the CFU-MK colonies were stained with anti-CD41 antibody and counted according to the MegaCult-C protocol (STEMCELL Technologies) under a light microscope (NIKON).

#### **Real-time PCR**

The quantitative polymerase chain reaction (qPCR) following reverse transcription (RT-qPCR) or CHIP (CHIP-qPCR) was carried out as previously described.<sup>1</sup> Primers are provided in Table S1.

**Table S1. A list of primers used for PCR.**

| <b>RT-qPCR primers</b>      |                           |                         |
|-----------------------------|---------------------------|-------------------------|
| Gene ID                     | Forward primer            | Reverse primer          |
| <i>NOTCH1</i>               | CGGGTCCACCAGTTTGAATG      | GTTGTATTGGTTCGGCACCAT   |
| <i>NOTCH2</i>               | TTTGGCAACTAACGTAGAACTCAAC | TGCCAAGAGCATGAATACAGAGA |
| <i>NOTCH3</i>               | TGATCGGCTCGGTAGTAATGC     | GACAACGCTCCCAGGTAGTCA   |
| <i>NOTCH4</i>               | CCTCCTAGGGGCTGTTCGAA      | GTAGGTGTCCAGCCCATCCT    |
| <i>HES1</i>                 | GCTGGAGAAGGCGGACATTC      | GCACCTCGGTATTAACGCC     |
| <i>HEY1</i>                 | AGAGTGC GGACGAGAATGGA     | AGCTTAGCAGATCCCTGCTTCT  |
| <i>RUNX1</i>                | GCCCCGAGAACCTCGAA         | CCGGGCTTGGTCTGATCAT     |
| <i>FLI1</i>                 | CCAACGAGAGGAGAGTCATCGT    | TGCCTCACATGCTCCTGTGT    |
| <i>GATA1</i>                | GCCTACAGACACTCCCAGTCT     | CTGGGATCCCCTCCATACAGT   |
| <i>SPI1</i>                 | CGCCAAACGCACGAGTATT       | TCCCAGTAATGGTCGCTATGG   |
| <i>KLF1</i>                 | GCCTGTTTGGTGGTCTCTTCA     | GGTCCATTCGTGGGAAAACC    |
| <i>CEBPA</i>                | GAGGGACCGGAGTTATGACAAG    | GGCACAGAGGCCAGATACAAG   |
| <i>NOTCH4</i> intron 29     | CAGGGACATGGTGTACCCCTAT    | CACCACAAACCCAGCACTGA    |
| <b>Primers for genotype</b> |                           |                         |
| Gene ID                     | Forward primer            | Reverse primer          |
| <i>NOTCH1</i> -KO           | AAAAGTTTCTACCTGGGGCCA     | TTCCTGAGTGGAGAGCCGAG    |
| <i>NOTCH2</i> -KO           | GGGATGGTGT CAGGTAGGGA     | AAGCACATAACCAACCCTCG    |
| <i>NOTCH3</i> -KO           | GTACCAAGCTGAGGACTCCC      | AGTCTGGAGGGGAGGTAGTC    |
| <i>NOTCH4</i> -KO           | GAAGGAGCCCAGGGTGTATG      | GCTAGAAACGGCTCCCTCTG    |
| <i>NOTCH4</i> intron 29     | CTACTTCCACCGCTCCTTCC      | CTGGGGTAACAACCTCCCAC    |
| <b>ChIP-qPCR primers</b>    |                           |                         |
| Gene ID                     | Forward primer            | Reverse primer          |
| <i>RUNX1</i> +23kb          | CCTGTGGTTTTCTCGCTCTC      | ATGCTGACAGCCTCAGATGG    |
| <i>RUNX1</i> +31kb          | AAAGCCACAAAAGAGATCTGG     | AGCACCTGCCAGAAGACATC    |
| <i>NOTCH4</i> intron 29     | GGGTAACAACCTCCCACGTC      | TCCTGGGCATCTTTATCGGC    |

**Table S2. A list of guide RNA (gRNA)-targeted DNA sequences.**

| Gene target             | gRNA1                 | gRNA2                |
|-------------------------|-----------------------|----------------------|
| <i>NOTCH1</i>           | TGACGTCGATCTCGCATCGG  |                      |
| <i>NOTCH2</i>           | CTCCACCTGCATCGACCGTG  |                      |
| <i>NOTCH3</i>           | CCGAGCTGCCGAAGCGACG   | GGGCACCTGTACCGACCACG |
| <i>NOTCH4</i>           | CAGAGCTGGGCGTTCTGGCA  |                      |
| <i>NOTCH4</i> intron 29 | GCCTTCACTTGC GCGACCAC | ACAGTCAGGCGCAGAGAGA  |

**Table S3. A list of genes that contain RUNX1-binding sites and are differentially expressed in isogenic *RUNX1*-corrected or mutated (FPD) iPSC-derived CD34<sup>+</sup> cells.**

| Genes        | Fold Change | P-value  | FDR      | Entrez Gene Name                                                      |
|--------------|-------------|----------|----------|-----------------------------------------------------------------------|
| PPP2R2C      | 12.03       | 3.85E-06 | 1.49E-03 | Protein phosphatase 2 regulatory subunit B gamma                      |
| C15orf53     | 8.59        | 5.67E-05 | 1.29E-02 | Chromosome 15 Open Reading Frame 53                                   |
| BCAN         | 8.14        | 1.14E-06 | 6.68E-04 | Brevican                                                              |
| LGALS1       | 7.76        | 2.93E-10 | 8.58E-07 | Galectin Like                                                         |
| VWA3B        | 6.49        | 8.77E-05 | 1.78E-02 | Von Willebrand Factor A Domain Containing 3B                          |
| TTC39B       | 5.83        | 2.69E-06 | 1.10E-03 | Tetratricopeptide Repeat Domain 39B                                   |
| SEC14L5      | 5.31        | 3.06E-04 | 4.14E-02 | SEC14 Like Lipid Binding 5                                            |
| EPB49        | 5.21        | 2.29E-05 | 6.16E-03 | Dematin Actin Binding Protein                                         |
| MPZL3        | 4.71        | 2.34E-04 | 3.52E-02 | Myelin Protein Zero Like 3                                            |
| ITGB3        | 4.45        | 1.28E-04 | 2.25E-02 | Integrin Subunit Beta 3; CD61; GPIIb                                  |
| PF4          | 4.23        | 3.75E-11 | 1.30E-07 | platelet factor 4                                                     |
| C11orf21     | 4.21        | 1.65E-05 | 4.98E-03 | Chromosome 11 Open Reading Frame 21                                   |
| RSPH1        | 4.18        | 1.00E-04 | 1.96E-02 | Radial Spoke Head 1 Homolog                                           |
| RGS9         | 4.14        | 1.28E-04 | 2.25E-02 | Regulator Of G Protein Signaling 9                                    |
| FHOD3        | 4.11        | 7.52E-06 | 2.57E-03 | Formin Homology 2 Domain Containing 3                                 |
| RTN1         | 4.04        | 1.27E-06 | 6.97E-04 | Reticulon 1                                                           |
| DAAM1        | 3.96        | 2.66E-07 | 2.10E-04 | Dishevelled Associated Activator Of Morphogenesis 1                   |
| CD226        | 3.94        | 9.32E-05 | 1.85E-02 | CD226 Molecule                                                        |
| GCSAML       | 3.88        | 3.40E-04 | 4.43E-02 | Germinal Center Associated Signaling And Motility Like                |
| MYLK         | 3.66        | 3.03E-04 | 4.14E-02 | Myosin Light Chain Kinase                                             |
| ADCY6        | 3.66        | 1.68E-06 | 7.48E-04 | Adenylate Cyclase 6                                                   |
| THBS1        | 3.40        | 1.45E-06 | 7.23E-04 | Thrombospondin 1                                                      |
| MFSD6        | 3.33        | 4.74E-06 | 1.70E-03 | Major Facilitator Superfamily Domain Containing 6                     |
| LOC100505702 | 3.20        | 3.46E-04 | 4.48E-02 |                                                                       |
| LDLRAD4      | 3.04        | 2.91E-05 | 7.54E-03 | Low Density Lipoprotein Receptor Class A Domain Containing 4          |
| ZNF175       | 2.97        | 1.34E-04 | 2.30E-02 | Zinc Finger Protein 175                                               |
| MFSD2B       | 2.82        | 3.63E-04 | 4.65E-02 | Major Facilitator Superfamily Domain Containing 2B                    |
| PIK3CB       | 2.78        | 4.44E-05 | 1.07E-02 | Phosphatidylinositol-4,5-Bisphosphate 3-Kinase Catalytic Subunit Beta |
| COL24A1      | 2.72        | 1.96E-05 | 5.43E-03 | Collagen Type XXIV Alpha 1 Chain                                      |
| ST8SIA6      | 2.70        | 7.04E-05 | 1.50E-02 | ST8 Alpha-N-Acetyl-Neuraminide Alpha-2,8-Sialyltransferase 6          |
| SLC37A1      | 2.63        | 8.45E-06 | 2.84E-03 | Solute Carrier Family 37 Member 1                                     |
| SAMD14       | 2.62        | 5.61E-05 | 1.29E-02 | Sterile Alpha Motif Domain Containing 14                              |
| ARHGAP6      | 2.51        | 1.51E-04 | 2.48E-02 | Rho GTPase Activating Protein 6                                       |
| ABCC4        | 2.51        | 1.53E-04 | 2.48E-02 | ATP Binding Cassette Subfamily C Member 4                             |
| UBASH3B      | 2.44        | 4.16E-05 | 1.03E-02 | Ubiquitin Associated And SH3 Domain Containing B                      |
| CD47         | 2.26        | 1.40E-04 | 2.36E-02 | CD47 Molecule                                                         |
| F2R          | 2.19        | 2.32E-04 | 3.52E-02 | Coagulation Factor II Thrombin Receptor                               |
| CD44         | -2.34       | 3.78E-04 | 4.76E-02 | CD44 Molecule (Indian Blood Group)                                    |
| PRCP         | -2.48       | 1.06E-04 | 2.00E-02 | Prolylcarboxypeptidase                                                |

|          |        |          |          |                                                        |
|----------|--------|----------|----------|--------------------------------------------------------|
| DUSP1    | -2.82  | 2.16E-05 | 5.90E-03 | Dual Specificity Phosphatase 1                         |
| KLF6     | -2.92  | 1.21E-04 | 2.16E-02 | Kruppel Like Factor 6                                  |
| COLEC12  | -2.99  | 2.45E-04 | 3.60E-02 | Collectin Subfamily Member 12                          |
| GAS7     | -3.02  | 2.13E-04 | 3.25E-02 | Growth Arrest Specific 7                               |
| TIAM1    | -3.29  | 2.72E-04 | 3.90E-02 | T-Cell Lymphoma Invasion And Metastasis 1              |
| PROCR    | -3.52  | 3.23E-04 | 4.29E-02 | Protein C Receptor                                     |
| GCNT1    | -3.66  | 2.52E-04 | 3.67E-02 | Glucosaminyl (N-Acetyl) Transferase 1, Core 2          |
| IMPA2    | -3.67  | 3.29E-04 | 4.34E-02 | Inositol Monophosphatase 2                             |
| KIAA1462 | -3.86  | 9.19E-07 | 6.07E-04 | Junctional Cadherin 5 Associated                       |
| APCDD1   | -4.40  | 3.07E-04 | 4.14E-02 | APC Down-Regulated 1                                   |
| TNFSF10  | -4.46  | 1.03E-04 | 1.97E-02 | TNF Superfamily Member 10                              |
| GALNTL4  | -4.48  | 1.02E-04 | 1.97E-02 | Polypeptide N-Acetylgalactosaminyltransferase 18       |
| FOS      | -4.66  | 3.77E-07 | 2.76E-04 | Fos Proto-Oncogene, AP-1 Transcription Factor Subunit  |
| VEGFC    | -4.68  | 4.04E-04 | 4.86E-02 | Vascular Endothelial Growth Factor C                   |
| SHE      | -4.74  | 1.29E-06 | 6.97E-04 | Src Homology 2 Domain Containing E                     |
| WFS1     | -4.74  | 3.49E-04 | 4.49E-02 | Wolframin ER Transmembrane Glycoprotein                |
| RPS6KA2  | -4.87  | 2.16E-07 | 1.84E-04 | Ribosomal Protein S6 Kinase A2                         |
| ERG      | -5.11  | 6.92E-08 | 7.09E-05 | ERG, ETS Transcription Factor                          |
| NOTCH4   | -5.52  | 3.04E-08 | 3.66E-05 | Notch 4                                                |
| LRIG3    | -5.58  | 1.61E-08 | 2.20E-05 | Leucine Rich Repeats And Immunoglobulin Like Domains 3 |
| BST2     | -5.61  | 4.62E-05 | 1.10E-02 | Bone Marrow Stromal Cell Antigen 2                     |
| CHST1    | -5.65  | 3.76E-04 | 4.76E-02 | Carbohydrate Sulfotransferase 1                        |
| SORL1    | -5.73  | 2.25E-07 | 1.84E-04 | Sortilin Related Receptor 1                            |
| KLF2     | -7.33  | 3.71E-06 | 1.46E-03 | Kruppel Like Factor 2                                  |
| MADCAM1  | -10.80 | 2.07E-04 | 3.22E-02 | Mucosal Vascular Addressin Cell Adhesion Molecule 1    |

**Figure S1**

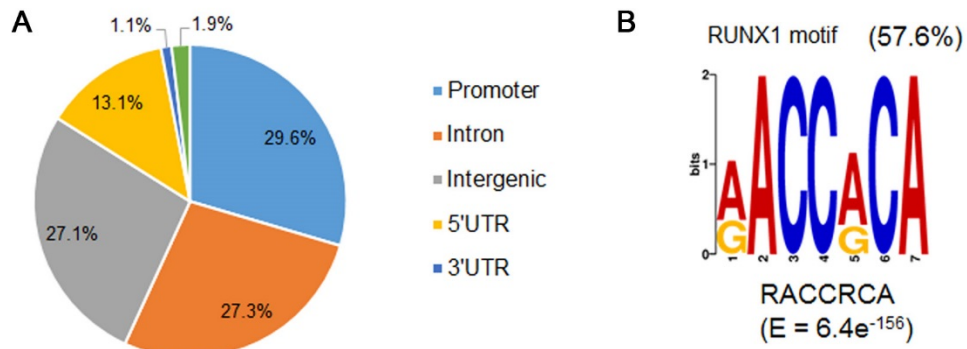

**Figure S1. Genome-wide occupancy of RUNX1 in BC1 iPSC-CD34<sup>+</sup> cells.** (A) Pie chart showing the distribution of RUNX1 binding peaks in BC1 iPSC-CD34<sup>+</sup> cells. (B) De novo motif discovery of sequences bound by RUNX1 in BC1 iPSC-CD34<sup>+</sup> cells is consistent with the known RUNX1 motif.

**Figure S2**

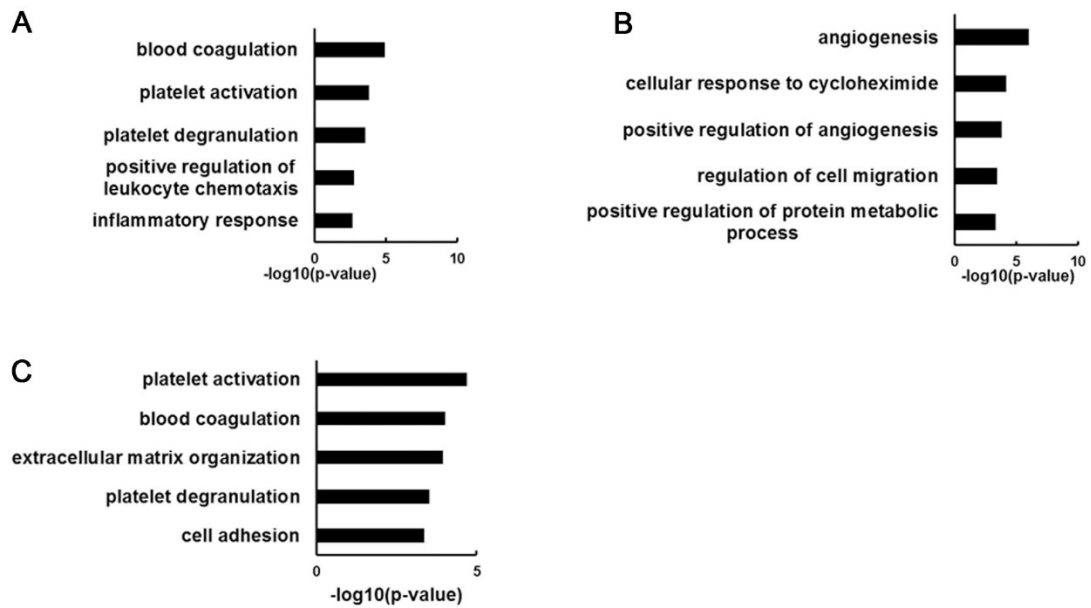

**Figure S2. Function enrichment analysis of differential expression genes.** (A) Gene Ontology (GO) enrichment analysis of upregulated genes in *RUNX1*-corrected-CD34<sup>+</sup> cells. (B) GO enrichment analysis of downregulated genes in *RUNX1*-corrected-CD34<sup>+</sup> cells. (C) GO enrichment analysis of *RUNX1* binding genes that are upregulated in *RUNX1*-corrected-CD34<sup>+</sup> cells.

**Figure S3**

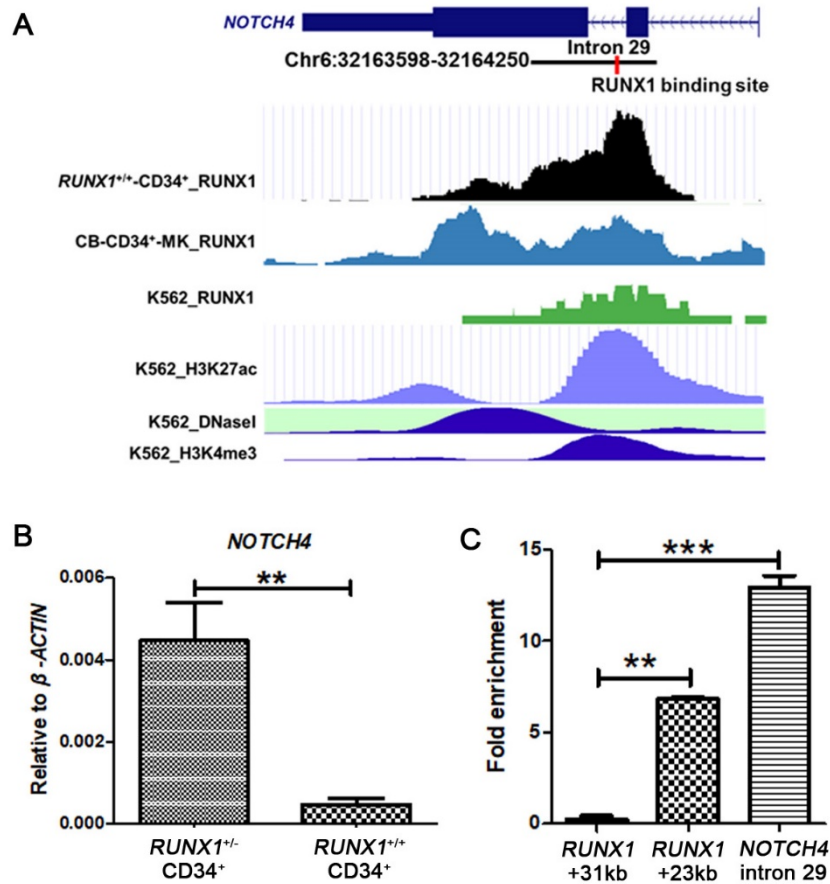

**Figure S3. *NOTCH4* is negatively controlled by RUNX1 via a DNA element within the intron 29 locus.** (A) RUNX1 binding region in intron 29 of *NOTCH4* is marked in the gene structure as a horizontal black line and the RUNX1 consensus binding site as a vertical red line. DNaseI hypersensitive sites and H3K4me3 and H3K27ac histone modifications in K562 cells are present in the RUNX1 binding region on the UCSC genome browser. Published RUNX1 binding profiles in K562 and CB (cord blood) CD34<sup>+</sup> induced megakaryocyte (MK) cells are also presented in the RUNX1 binding region.<sup>2,3</sup> (B) Downregulation of *NOTCH4* detected by RNA-Seq was validated by RT-qPCR using cDNA from RUNX1<sup>+/-</sup> CD34<sup>+</sup> and RUNX1<sup>+/+</sup> CD34<sup>+</sup> cells.  $\beta$ -ACTIN was used as an internal control. Data are shown as the means  $\pm$  SEM, n = 2 (biological replicates). \*\**P* < .01. (C) Confirmation of RUNX1 occupancy regions in intron 29 of the *NOTCH4* gene locus by ChIP-qPCR. The RUNX1 intron 1 +23 kb enhancer was used as a positive region and the RUNX1 +31 kb as a corresponding negative region.<sup>2</sup> Signals detected by RUNX1 antibody were compared to input. Data are shown as the means  $\pm$  SEM, n = 3 (technical replicates). \*\**P* < .01; \*\*\**P* < .001.

**Figure S4**

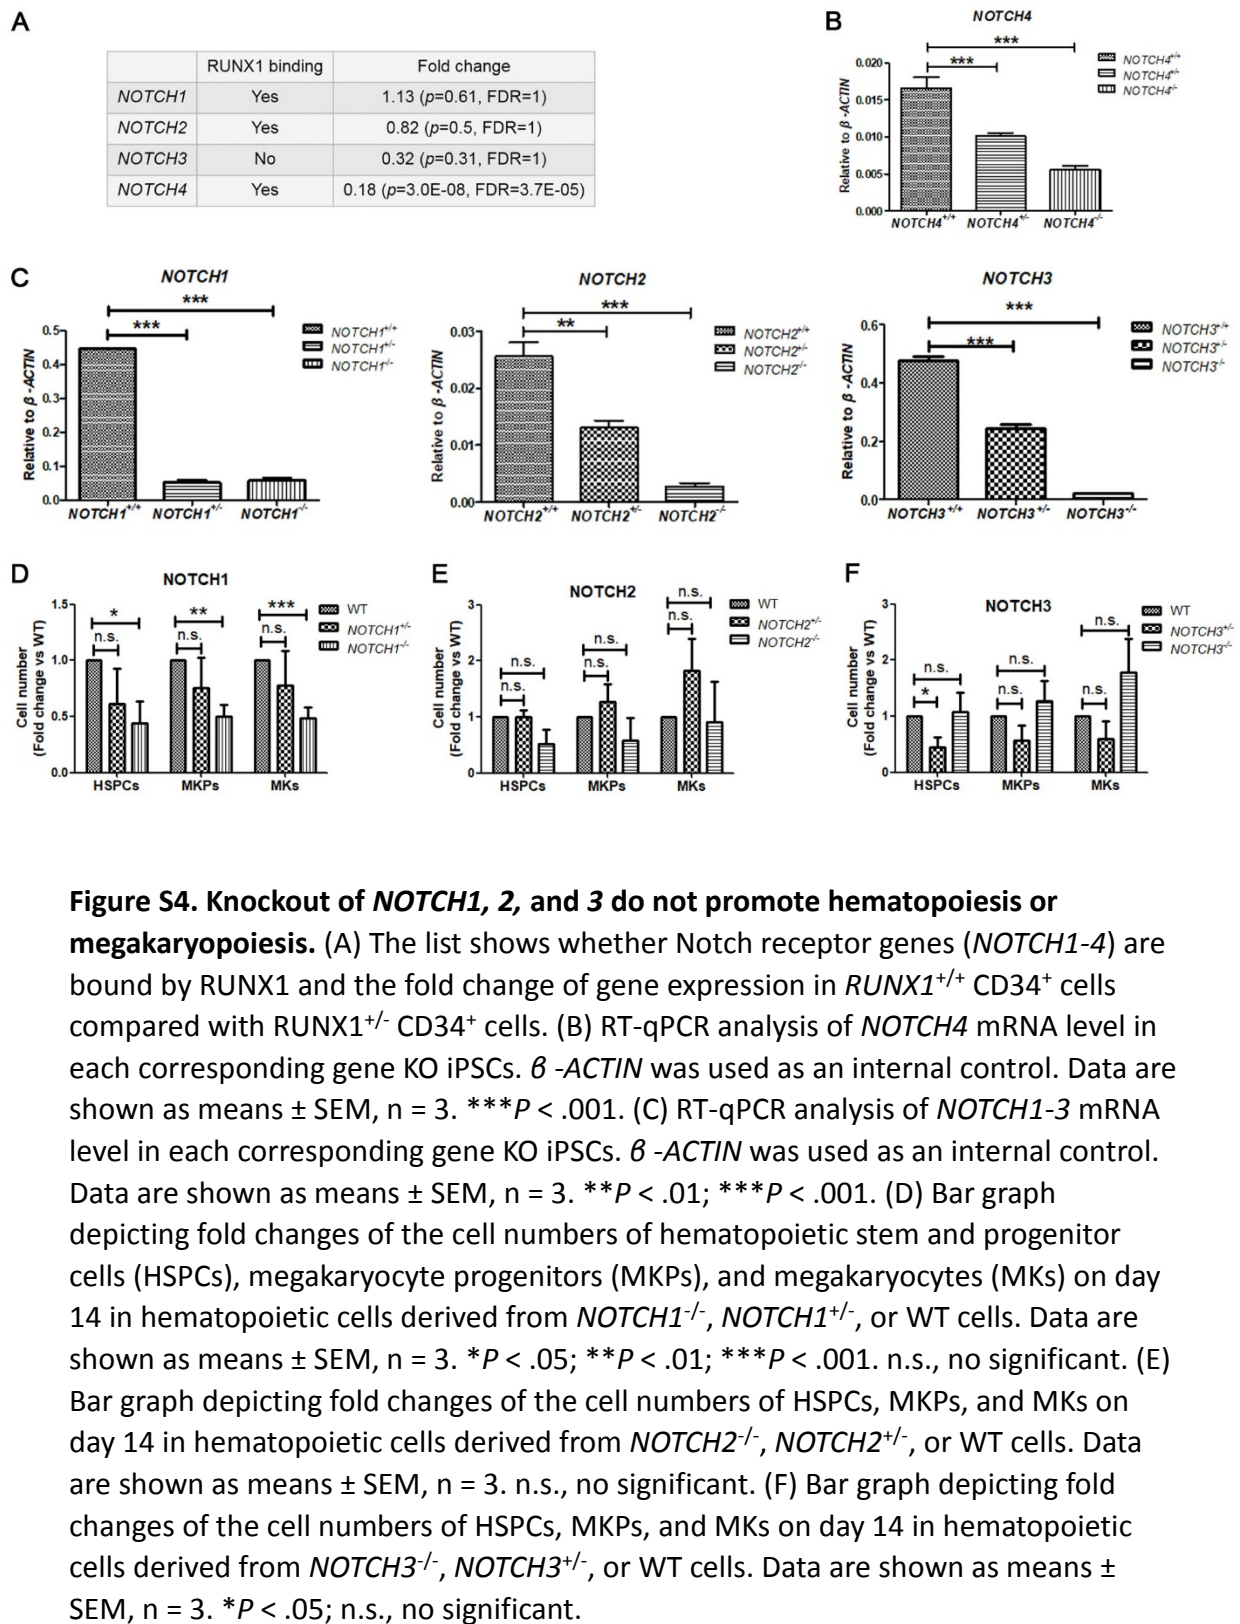



**Figure S5**

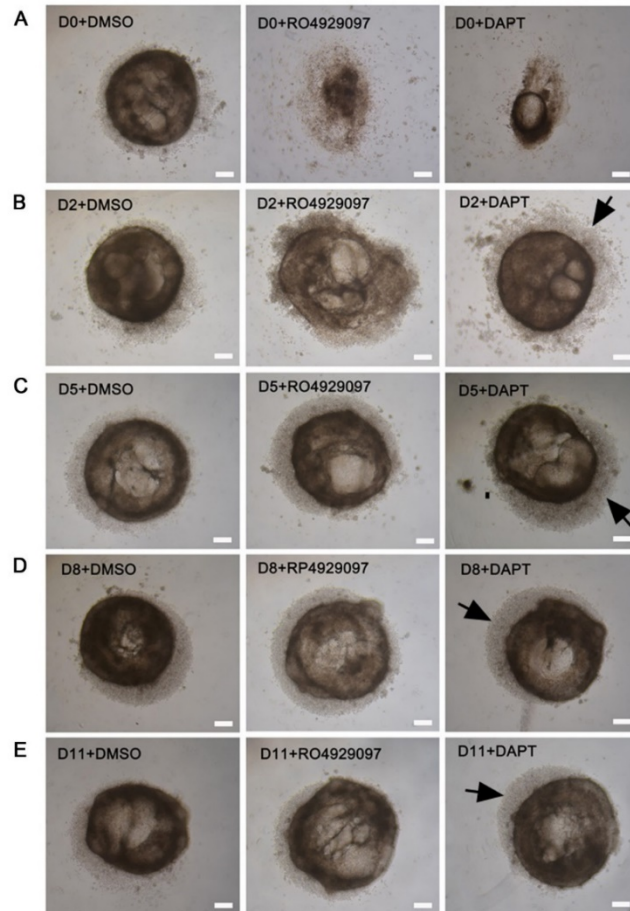

**Figure S5. Inhibition of Notch signaling from days 0, 2, 5, 8, or 11 has different effects on megakaryopoiesis.** Representative images of day 14 embryoid bodies derived from BC1 iPSCs after addition of 10µM gamma secretase inhibitors (GSIs; RO4929097, DAPT) or DMSO (control) from different time points (day 0 (A), day 2 (B), day 5 (C), day 8 (D), and day 11 (E)). Arrows indicate surrounding cells. Scale bars = 100 µm.

**Figure S6**

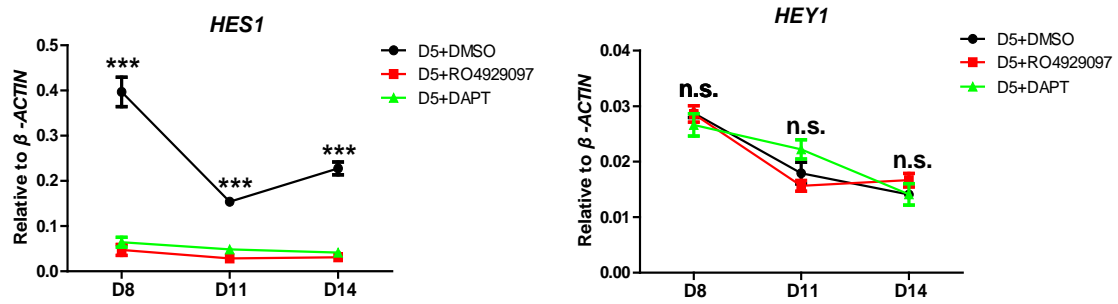

**Figure S6. GSI addition results in NOTCH inhibition by suppressing HES1 expression.** RT-qPCR analysis of *HES1* and *HEY1* mRNA level at day 8, 11 and 14 after 10 $\mu$ M GSIs (RO4929097/DAPT) or DMSO (control) addition from day 5.  $\beta$ -ACTIN was used as an internal control. Data are shown as means  $\pm$  SEM, n = 3. \*\*\* $P$  < .001. n.s., no significant.

Figure S7

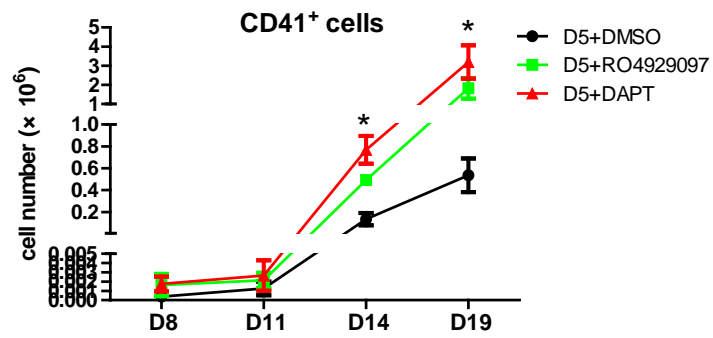

**Figure S7. GSIs promote the expansion of CD41<sup>+</sup> MKs that are generated from BC1 cells.** The cell number of megakaryocytes (CD41<sup>+</sup> cells) at day 8, 11, 14 and 19 after 10 $\mu$ M GSIs (RO4929097/DAPT) or DMSO (control) addition from day 5. Data are shown as means  $\pm$  SEM, n = 3. \* $P$  < .05.

**Figure S8**

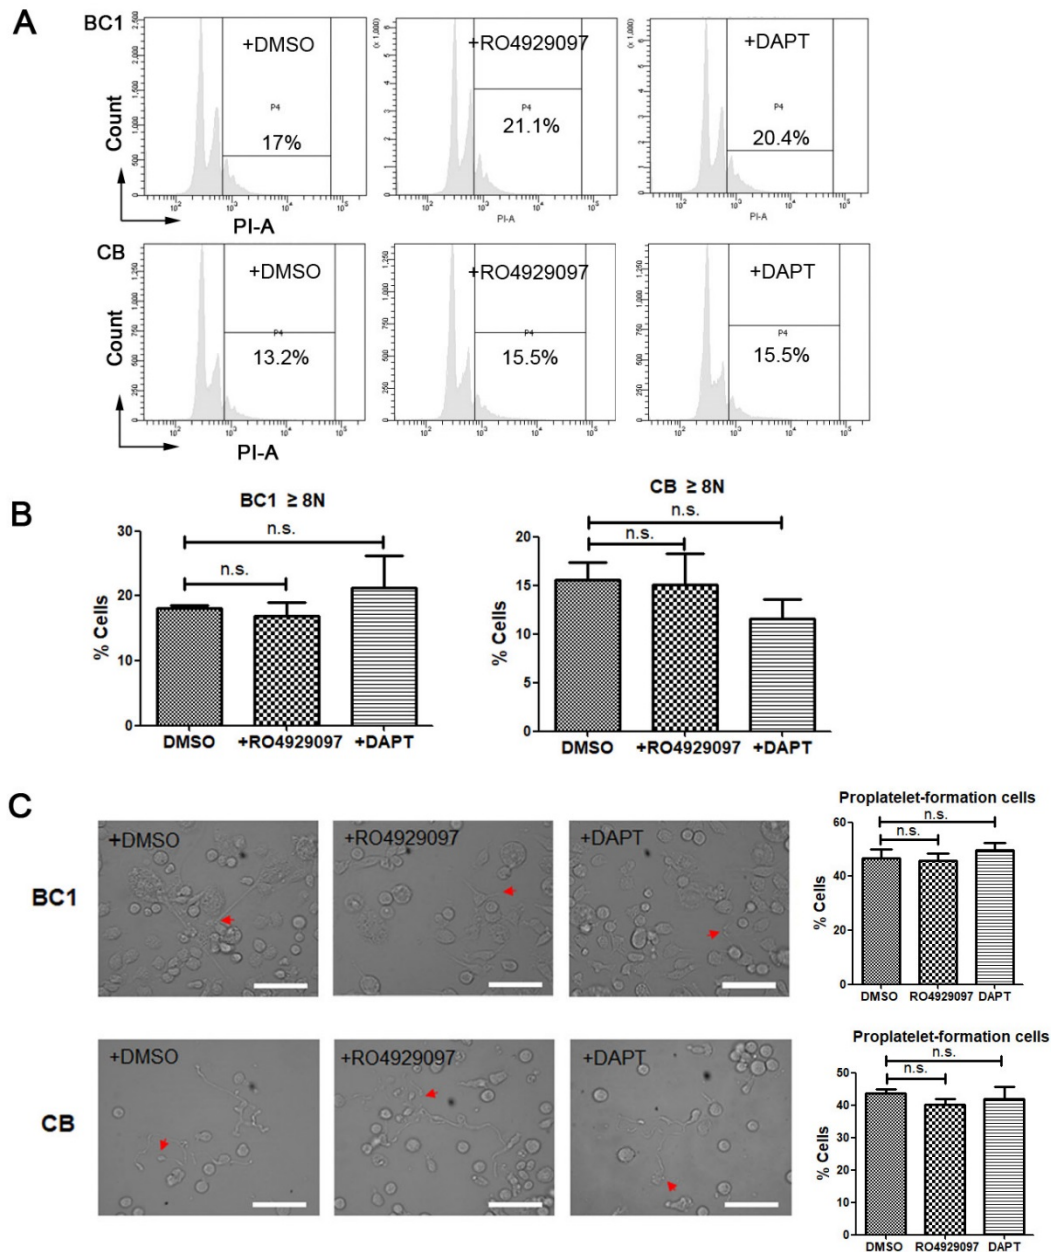

**Figure S8. Characterization of MK cells that are generated from human iPS cells (BC1) or cord blood CD34<sup>+</sup> cells in the presence of GSIs (RO4929097 or DAPT) or DMSO (control).** (A) DNA content analysis by flow cytometry of CD61<sup>+</sup> cells with DNA content  $\geq 8N$ , with addition of 10 $\mu$ M gamma secretase inhibitors (GSIs; RO4929097 or DAPT) or DMSO (control). (B) Bar graph depicting the proportion of CD61<sup>+</sup> cells with DNA content  $\geq 8N$ . Data are shown as the means  $\pm$  SEM,  $n = 3$ . n.s., no significant. (C) Phase contrast picture of spontaneous proplatelet-forming MKs and the percentage of MKs forming proplatelets, with addition of 10 $\mu$ M gamma secretase inhibitors (GSIs; RO4929097 or DAPT) or DMSO (control). Scale bars = 100  $\mu$ m. Data are shown as the means  $\pm$  SEM,  $n = 3$ . n.s., no significant.

**Figure S9**

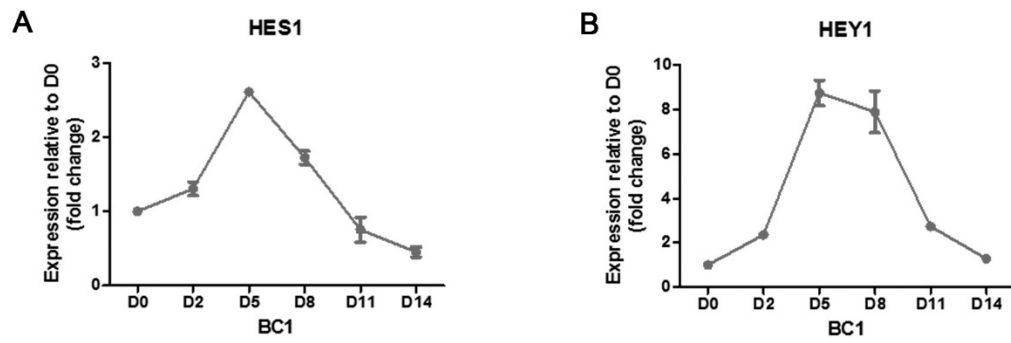

**Figure S9. Expression of *HES1* and *HEY1* during differentiation.** (A-B) RT-qPCR analysis of *HES1* or *HEY1* mRNA level throughout differentiation of BC1 iPSCs.  $\beta$  - *ACTIN* was used as an internal control. Results from day 0 were set to 1. Data are shown as means  $\pm$  SEM, n = 3.

**Figure S10**

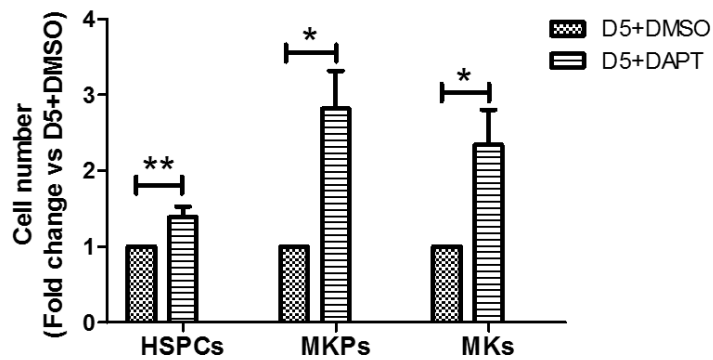

**Figure S10. Inhibition of Notch signaling promotes megakaryopoiesis from different iPSCs.** Bar graph depicting fold changes of the cell numbers of hematopoietic stem and progenitor cells (HSPCs), megakaryocyte progenitors (MKPs), and megakaryocytes (MKs) on day 14 derived from iPSC-U21 cells, with addition of after 10 $\mu$ M gamma secretase inhibitors (GSIs; DAPT) or DMSO (control) from day 5. Data are shown as means  $\pm$  SEM, n = 5. \* $P$  < .05; \*\* $P$  < .01.

**Figure S11**

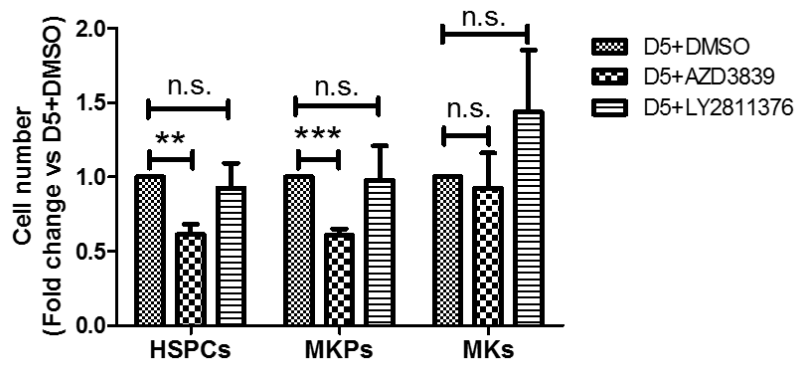

**Figure S11. Beta-secretase inhibitors do not promote megakaryopoiesis.** Bar graph depicting fold changes of the cell numbers of hematopoietic stem and progenitor cells (HSPCs), megakaryocyte progenitors (MKPs), and megakaryocytes (MKs) on day 14 in hematopoietic cells derived from BC1 iPSCs cells, with addition of after 10 $\mu$ M beta-secretase inhibitors (AZD3839, LY2811376) or DMSO (control) from day 2. Data are shown as the means  $\pm$  SEM, n = 3. n.s., no significant.

**Figure S12**

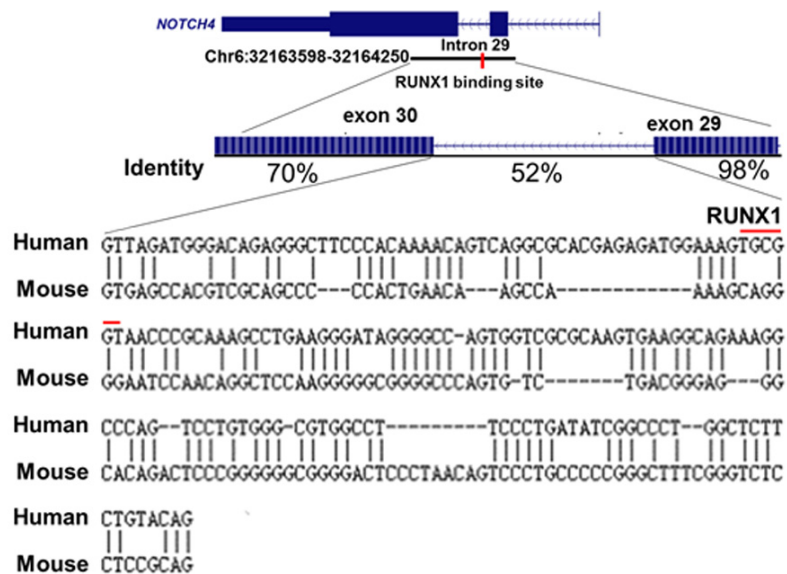

**Figure S12. The RUNX1 binding site is not present in the mouse *Notch4* intron 29.** The 3' region of the human *NOTCH4* gene is enlarged. The genomic location of the RUNX1 binding region determined by ChIP-Seq is marked in the gene structure as a horizontal black line and the RUNX1 consensus binding site as a vertical red line. The identity of RUNX1 binding region between human and mouse is shown. Global alignment of human and mouse *NOTCH4* intron 29 sequences with BLAST, the RUNX1 binding site in human *NOTCH4* intron 29 is marked as a horizontal red line.



**Figure S13**

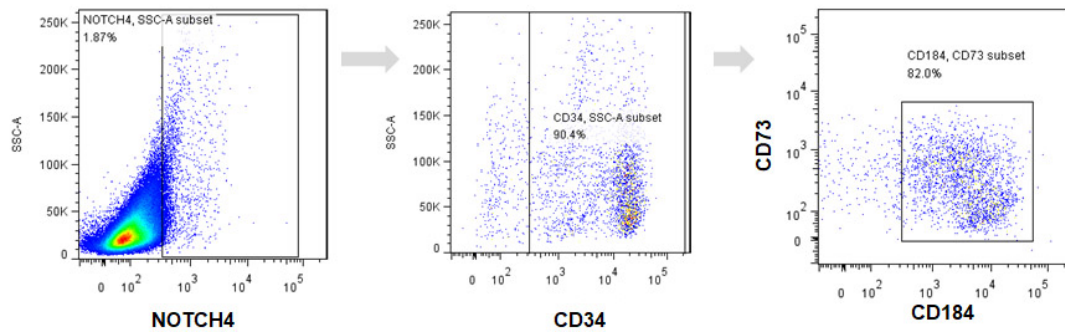

**Figure S13. NOTCH4 is mainly restricted in a subpopulation of vascular endothelium (VE) (CD34<sup>+</sup>CD73<sup>±</sup>CD184<sup>+</sup>).** Representative FACS analysis of the cell population that expressed NOTCH4 at day 5 during MK differentiation from BC1 iPSCs.

**Figure S14**

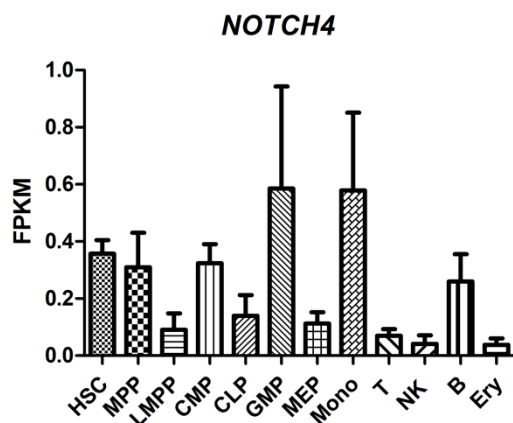

**Figure S14. *NOTCH4* mRNA expression is detected in HSC, and multiple progenitor cell populations from human bone marrow.** FPKM plot depicting the expression of *NOTCH4* in HSC, multiple progenitor cell populations (MPP, LMPP, CMP, CLP, GMP and MEP), and mature blood cells (mono, T, NK, B and Ery), purified from human bone marrow, by analyzing the published RNA-Seq data (GSE74246).<sup>4</sup> HSC, hematopoietic stem cell; MPP, multipotent progenitor; LMPP, lymphoid-primed multipotent progenitor; CMP, common myeloid progenitor; CLP, common lymphoid progenitor; GMP, granulocyte-macrophage progenitor; MEP, megakaryocyte-erythrocyte progenitor; mono, monocyte; T, T cell; NK, natural killer cell; B, B cell; Ery, erythroid.

**Figure S15**

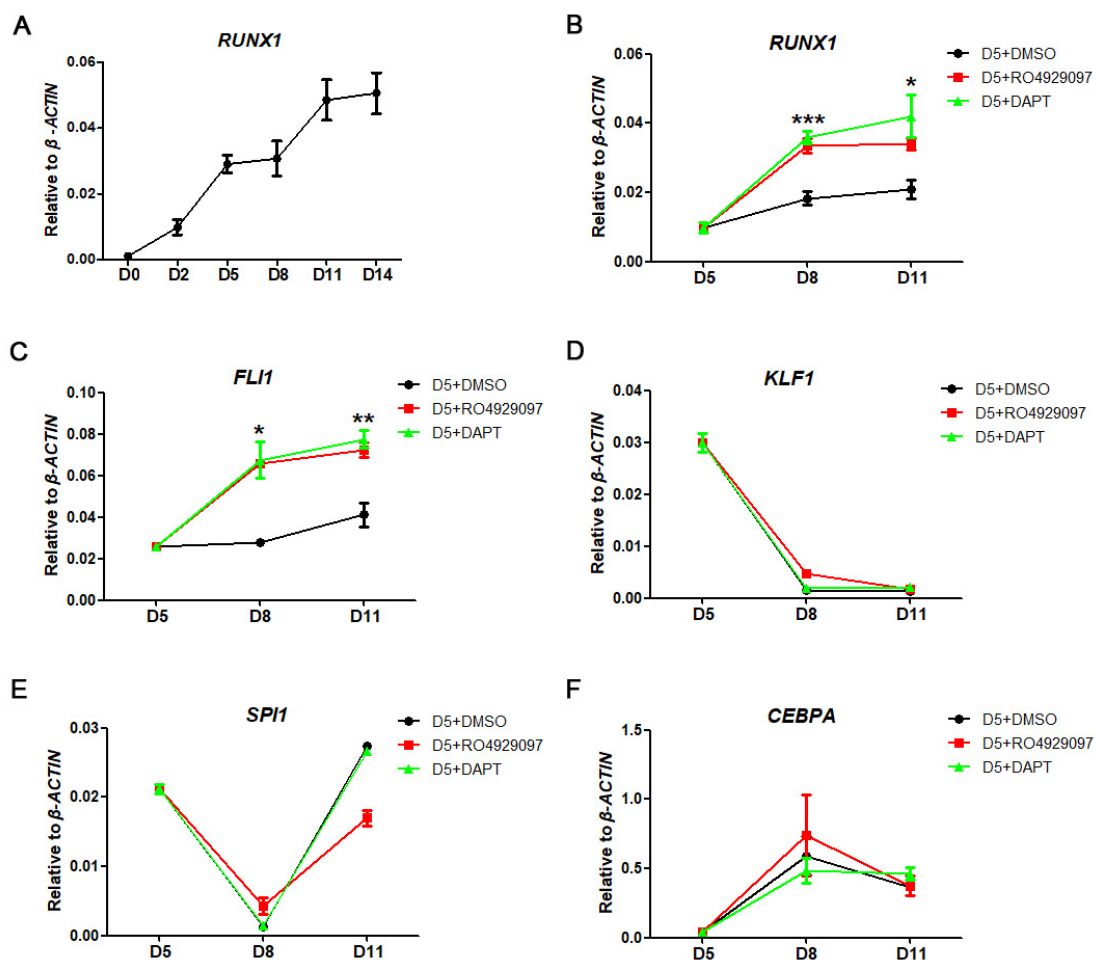

**Figure S15. GSIs increase the expression of megakaryocyte lineage specific transcription factors.** (A) RT-qPCR analysis of mRNA level of *RUNX1* at day 0, 2, 5, 8, 11 and 14 during differentiation from BC1 iPSCs.  $\beta$ -ACTIN was used as an internal control. Data are shown as means  $\pm$  SEM, n = 7. (B-F) RT-qPCR analysis of mRNA level of *RUNX1* (B), *FLI1* (C), *KLF1* (D), *SPI1* (E) and *CEBPA* (F) at day 5, 8 and 11 after 10 $\mu$ M GSIs (RO4929097/DAPT) or DMSO (control) addition from day 5.  $\beta$ -ACTIN was used as an internal control. Data are shown as means  $\pm$  SEM, n = 3. \* $P$  < .05; \*\* $P$  < .01; \*\*\* $P$  < .001.

**Figure S16**

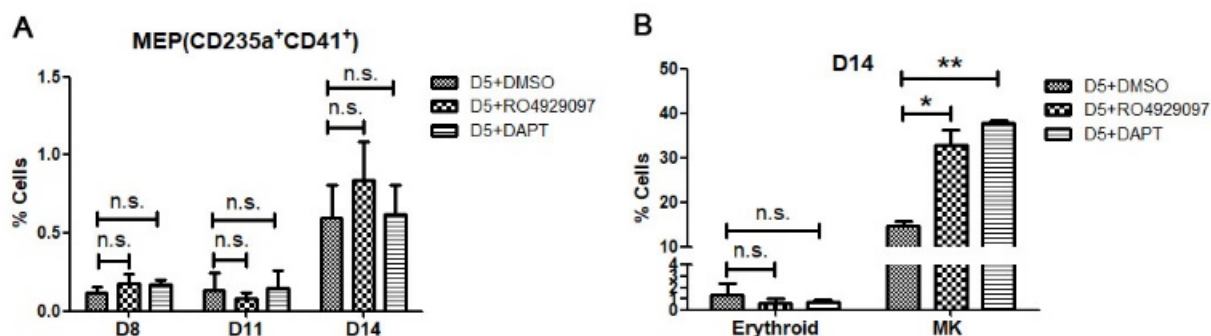

**Figure S16. The low efficiency of MEPs and erythroid cells production detected at different time points.** (A) Bar graph depicting the percentage of MEP (CD235a<sup>+</sup>CD41<sup>+</sup>) at day 8, 11 and 14 in hematopoietic cells differentiated from BC1 iPSCs, with addition of 10 $\mu$ M GSIs (RO4929097/DAPT) or DMSO (control) from day 5. Data are shown as means  $\pm$  SEM, n = 3. n.s., no significant. (B) Bar graph depicting the percentages of erythroid cells (CD235a<sup>+</sup>CD41<sup>-</sup>) and megakaryocytes (CD235a<sup>-</sup>CD41<sup>+</sup>) on day 14 in hematopoietic cells differentiated from BC1 iPSCs, with addition of 10 $\mu$ M GSIs (RO4929097/DAPT) or DMSO (control) from day 5. Data are shown as means  $\pm$  SEM, n = 3. \* $P$  < .05; \*\* $P$  < .01; n.s., no significant.

## References

1. Zhou J, Wu J, Li B, et al. PU. 1 is essential for MLL leukemia partially via crosstalk with the MEIS/HOX pathway. *Leukemia*. 2014;28(7):1436-1448.
2. Tijssen MR, Cvejic A, Joshi A, et al. Genome-wide analysis of simultaneous GATA1/2, RUNX1, FLI1, and SCL binding in megakaryocytes identifies hematopoietic regulators. *Dev Cell*. 2011;20(5):597-609.
3. Consortium EP. An integrated encyclopedia of DNA elements in the human genome. *Nature*. 2012;489(7414):57-74.
4. Corces MR, Buenrostro JD, Wu B, et al. Lineage-specific and single-cell chromatin accessibility charts human hematopoiesis and leukemia evolution. *Nat Genet*. 2016;48(10):1193-1203.
